# Supplementary material for: Climate and local abundance in freshwater fishes
Source: PubMed Central journal article supplement (PMC4929904; doi:10.1098/rsos.160093), 2016-06-22
Supplement: rsos160093supp1.pdf [file rsos160093supp1.pdf]

**Appendix A.** Principal component loadings for climate variables for each species.

| Species                      | Climate Variable                         | PC1    | PC2    | PC3 |
|------------------------------|------------------------------------------|--------|--------|-----|
| <i>Campostoma anomalum</i>   | Mean Annual Temperature (K)              | 0.938  | 0.275  | -   |
|                              | Mean Diurnal Range (K)                   | 0.581  | 0.257  | -   |
|                              | Temperature Seasonality                  | -0.817 | -0.507 | -   |
|                              | Maximum Temperature of Warmest Month (K) | 0.828  | -0.333 | -   |
|                              | Minimum Temperature of Coldest Month (K) | 0.917  | 0.362  | -   |
|                              | Temperature Annual Range (K)             | -0.744 | -0.585 | -   |
|                              | Annual Precipitation (mm)                | 0.154  | 0.937  | -   |
|                              | Precipitation of Wettest Month (mm)      | 0.096  | 0.679  | -   |
|                              | Precipitation of Driest Month (mm)       | 0.342  | 0.913  | -   |
|                              | Precipitation Seasonality                | -0.256 | -0.898 | -   |
| <i>Campostoma oligolepis</i> | Mean Annual Temperature (K)              | 0.862  | 0.443  | -   |
|                              | Mean Diurnal Range (K)                   | -0.003 | 0.943  | -   |
|                              | Temperature Seasonality                  | -0.961 | -0.158 | -   |
|                              | Maximum Temperature of Warmest Month (K) | 0.453  | 0.743  | -   |

|                         |                                          |        |        |        |
|-------------------------|------------------------------------------|--------|--------|--------|
|                         | Minimum Temperature of Coldest Month (K) | 0.957  | 0.210  | -      |
|                         | Temperature Annual Range (K)             | -0.975 | 0.105  | -      |
|                         | Annual Precipitation (mm)                | 0.926  | 0.275  | -      |
|                         | Precipitation of Wettest Month (mm)      | 0.843  | 0.165  | -      |
|                         | Precipitation of Driest Month (mm)       | 0.897  | 0.278  | -      |
|                         | Precipitation Seasonality                | -0.666 | -0.253 | -      |
| <i>Cottus carolinae</i> | Mean Annual Temperature (K)              | 0.382  | 0.849  | -0.287 |
|                         | Mean Diurnal Range (K)                   | 0.008  | -0.127 | 0.860  |
|                         | Temperature Seasonality                  | -0.686 | 0.136  | 0.602  |
|                         | Maximum Temperature of Warmest Month (K) | -0.004 | 0.968  | 0.135  |
|                         | Minimum Temperature of Coldest Month (K) | 0.598  | 0.488  | -0.589 |
|                         | Temperature Annual Range (K)             | -0.642 | 0.185  | 0.722  |
|                         | Annual Precipitation (mm)                | 0.811  | 0.517  | -0.121 |
|                         | Precipitation of Wettest Month (mm)      | 0.654  | 0.684  | -0.212 |
|                         | Precipitation of Driest Month (mm)       | 0.939  | -0.124 | -0.056 |
|                         | Precipitation Seasonality                | -0.256 | 0.927  | -0.011 |

|                              |                                          |        |        |   |
|------------------------------|------------------------------------------|--------|--------|---|
| <i>Cyprinella analostoma</i> | Mean Annual Temperature (K)              | 0.972  | 0.066  | - |
|                              | Mean Diurnal Range (K)                   | 0.722  | 0.339  | - |
|                              | Temperature Seasonality                  | -0.968 | -0.226 | - |
|                              | Maximum Temperature of Warmest Month (K) | 0.946  | 0.099  | - |
|                              | Minimum Temperature of Coldest Month (K) | 0.978  | 0.095  | - |
|                              | Temperature Annual Range (K)             | -0.964 | -0.096 | - |
|                              | Annual Precipitation (mm)                | 0.427  | 0.822  | - |
|                              | Precipitation of Wettest Month (mm)      | 0.784  | 0.491  | - |
|                              | Precipitation of Driest Month (mm)       | -0.093 | 0.887  | - |
|                              | Precipitation Seasonality                | 0.924  | 0.117  | - |
| <i>Cyprinella spiloptera</i> | Mean Annual Temperature (K)              | 0.889  | 0.386  | - |
|                              | Mean Diurnal Range (K)                   | 0.132  | 0.769  | - |
|                              | Temperature Seasonality                  | -0.897 | -0.381 | - |
|                              | Maximum Temperature of Warmest Month (K) | 0.586  | 0.639  | - |
|                              | Minimum Temperature of Coldest Month (K) | 0.937  | 0.335  | - |
|                              | Temperature Annual Range (K)             | -0.956 | -0.255 | - |

|                           |                                          |        |        |   |
|---------------------------|------------------------------------------|--------|--------|---|
|                           | Annual Precipitation (mm)                | 0.822  | 0.490  | - |
|                           | Precipitation of Wettest Month (mm)      | 0.292  | 0.833  | - |
|                           | Precipitation of Driest Month (mm)       | 0.947  | 0.276  | - |
|                           | Precipitation Seasonality                | -0.954 | -0.124 | - |
| <i>Cyprinella venusta</i> | Mean Annual Temperature (K)              | -0.497 | 0.821  | - |
|                           | Mean Diurnal Range (K)                   | -0.044 | 0.694  | - |
|                           | Temperature Seasonality                  | 0.101  | -0.986 | - |
|                           | Maximum Temperature of Warmest Month (K) | -0.818 | 0.197  | - |
|                           | Minimum Temperature of Coldest Month (K) | -0.296 | 0.926  | - |
|                           | Temperature Annual Range (K)             | -0.087 | -0.959 | - |
|                           | Annual Precipitation (mm)                | 0.979  | -0.048 | - |
|                           | Precipitation of Wettest Month (mm)      | 0.922  | 0.113  | - |
|                           | Precipitation of Driest Month (mm)       | 0.927  | -0.232 | - |
|                           | Precipitation Seasonality                | -0.849 | 0.258  | - |
| <i>Esox americanus</i>    | Mean Annual Temperature (K)              | 0.978  | 0.003  | - |
|                           | Mean Diurnal Range (K)                   | 0.666  | 0.027  | - |

|                               |                                          |        |        |   |
|-------------------------------|------------------------------------------|--------|--------|---|
|                               | Temperature Seasonality                  | -0.938 | -0.116 | - |
|                               | Maximum Temperature of Warmest Month (K) | 0.901  | -0.080 | - |
|                               | Minimum Temperature of Coldest Month (K) | 0.972  | 0.080  | - |
|                               | Temperature Annual Range (K)             | -0.882 | -0.136 | - |
|                               | Annual Precipitation (mm)                | 0.705  | 0.599  | - |
|                               | Precipitation of Wettest Month (mm)      | 0.857  | 0.177  | - |
|                               | Precipitation of Driest Month (mm)       | 0.368  | 0.908  | - |
|                               | Precipitation Seasonality                | 0.338  | -0.876 | - |
| <i>Etheostoma blennioides</i> | Mean Annual Temperature (K)              | 0.964  | -0.088 | - |
|                               | Mean Diurnal Range (K)                   | 0.649  | -0.347 | - |
|                               | Temperature Seasonality                  | -0.585 | 0.747  | - |
|                               | Maximum Temperature of Warmest Month (K) | 0.849  | 0.428  | - |
|                               | Minimum Temperature of Coldest Month (K) | 0.880  | -0.334 | - |
|                               | Temperature Annual Range (K)             | -0.352 | 0.842  | - |
|                               | Annual Precipitation (mm)                | 0.761  | -0.436 | - |
|                               | Precipitation of Wettest Month (mm)      | 0.818  | -0.258 | - |

|                              |                                          |        |        |        |
|------------------------------|------------------------------------------|--------|--------|--------|
|                              | Precipitation of Driest Month (mm)       | 0.460  | -0.773 | -      |
|                              | Precipitation Seasonality                | 0.224  | 0.866  | -      |
| <i>Etheostoma caeruleum</i>  | Mean Annual Temperature (K)              | 0.657  | 0.713  | 0.201  |
|                              | Mean Diurnal Range (K)                   | 0.114  | 0.942  | -0.268 |
|                              | Temperature Seasonality                  | -0.834 | -0.321 | 0.327  |
|                              | Maximum Temperature of Warmest Month (K) | 0.238  | 0.859  | 0.429  |
|                              | Minimum Temperature of Coldest Month (K) | 0.900  | 0.367  | 0.077  |
|                              | Temperature Annual Range (K)             | -0.882 | 0.297  | 0.281  |
|                              | Annual Precipitation (mm)                | 0.894  | 0.331  | -0.014 |
|                              | Precipitation of Wettest Month (mm)      | 0.920  | 0.295  | 0.062  |
|                              | Precipitation of Driest Month (mm)       | 0.858  | 0.125  | -0.408 |
|                              | Precipitation Seasonality                | -0.181 | 0.052  | 0.966  |
| <i>Etheostoma flabellare</i> | Mean Annual Temperature (K)              | 0.424  | 0.876  | -      |
|                              | Mean Diurnal Range (K)                   | 0.560  | 0.649  | -      |
|                              | Temperature Seasonality                  | -0.906 | -0.356 | -      |
|                              | Maximum Temperature of Warmest Month (K) | -0.233 | 0.946  | -      |

|                             |                                          |        |        |   |
|-----------------------------|------------------------------------------|--------|--------|---|
|                             | Minimum Temperature of Coldest Month (K) | 0.684  | 0.683  | - |
|                             | Temperature Annual Range (K)             | -0.946 | -0.197 | - |
|                             | Annual Precipitation (mm)                | 0.711  | 0.536  | - |
|                             | Precipitation of Wettest Month (mm)      | 0.438  | 0.619  | - |
|                             | Precipitation of Driest Month (mm)       | 0.934  | 0.285  | - |
|                             | Precipitation Seasonality                | -0.956 | 0.014  | - |
| <i>Etheostoma olmstedii</i> | Mean Annual Temperature (K)              | 0.963  | 0.099  | - |
|                             | Mean Diurnal Range (K)                   | 0.672  | -0.205 | - |
|                             | Temperature Seasonality                  | -0.968 | -0.187 | - |
|                             | Maximum Temperature of Warmest Month (K) | 0.950  | -0.076 | - |
|                             | Minimum Temperature of Coldest Month (K) | 0.964  | 0.153  | - |
|                             | Temperature Annual Range (K)             | -0.918 | -0.290 | - |
|                             | Annual Precipitation (mm)                | 0.415  | 0.859  | - |
|                             | Precipitation of Wettest Month (mm)      | 0.820  | 0.461  | - |
|                             | Precipitation of Driest Month (mm)       | -0.303 | 0.899  | - |
|                             | Precipitation Seasonality                | 0.897  | -0.214 | - |

|                             |                                          |        |        |        |
|-----------------------------|------------------------------------------|--------|--------|--------|
| <i>Fundulus olivaceus</i>   | Mean Annual Temperature (K)              | 0.954  | -0.287 | 0.061  |
|                             | Mean Diurnal Range (K)                   | 0.032  | 0.815  | -0.145 |
|                             | Temperature Seasonality                  | -0.914 | -0.295 | -0.167 |
|                             | Maximum Temperature of Warmest Month (K) | 0.374  | -0.832 | -0.215 |
|                             | Minimum Temperature of Coldest Month (K) | 0.981  | -0.113 | 0.146  |
|                             | Temperature Annual Range (K)             | -0.947 | -0.145 | -0.234 |
|                             | Annual Precipitation (mm)                | 0.596  | 0.603  | 0.456  |
|                             | Precipitation of Wettest Month (mm)      | 0.548  | 0.721  | 0.302  |
|                             | Precipitation of Driest Month (mm)       | 0.214  | 0.159  | 0.872  |
|                             | Precipitation Seasonality                | -0.103 | 0.031  | -0.817 |
| <i>Lepistoseus oculatus</i> | Mean Annual Temperature (K)              | 0.972  | 0.045  | -      |
|                             | Mean Diurnal Range (K)                   | 0.532  | -0.135 | -      |
|                             | Temperature Seasonality                  | -0.923 | -0.169 | -      |
|                             | Maximum Temperature of Warmest Month (K) | 0.750  | -0.266 | -      |
|                             | Minimum Temperature of Coldest Month (K) | 0.973  | 0.152  | -      |
|                             | Temperature Annual Range (K)             | -0.816 | -0.358 | -      |

|                            |                                          |        |        |   |
|----------------------------|------------------------------------------|--------|--------|---|
|                            | Annual Precipitation (mm)                | -0.020 | 0.968  | - |
|                            | Precipitation of Wettest Month (mm)      | 0.183  | 0.861  | - |
|                            | Precipitation of Driest Month (mm)       | 0.019  | 0.943  | - |
|                            | Precipitation Seasonality                | 0.066  | -0.817 | - |
| <i>Lepistoseus osseus</i>  | Mean Annual Temperature (K)              | 0.984  | -0.019 | - |
|                            | Mean Diurnal Range (K)                   | 0.745  | 0.210  | - |
|                            | Temperature Seasonality                  | -0.940 | -0.189 | - |
|                            | Maximum Temperature of Warmest Month (K) | 0.852  | -0.304 | - |
|                            | Minimum Temperature of Coldest Month (K) | 0.983  | 0.060  | - |
|                            | Temperature Annual Range (K)             | -0.854 | -0.313 | - |
|                            | Annual Precipitation (mm)                | 0.019  | 0.975  | - |
|                            | Precipitation of Wettest Month (mm)      | 0.352  | 0.820  | - |
|                            | Precipitation of Driest Month (mm)       | 0.192  | 0.941  | - |
|                            | Precipitation Seasonality                | 0.152  | -0.858 | - |
| <i>Moxostoma duquesnei</i> | Mean Annual Temperature (K)              | 0.920  | -0.308 | - |
|                            | Mean Diurnal Range (K)                   | 0.580  | -0.525 | - |

|                             |                                          |        |        |   |
|-----------------------------|------------------------------------------|--------|--------|---|
|                             | Temperature Seasonality                  | -0.454 | 0.853  | - |
|                             | Maximum Temperature of Warmest Month (K) | 0.941  | 0.223  | - |
|                             | Minimum Temperature of Coldest Month (K) | 0.783  | -0.539 | - |
|                             | Temperature Annual Range (K)             | -0.271 | 0.877  | - |
|                             | Annual Precipitation (mm)                | 0.834  | -0.418 | - |
|                             | Precipitation of Wettest Month (mm)      | 0.914  | -0.217 | - |
|                             | Precipitation of Driest Month (mm)       | 0.457  | -0.761 | - |
|                             | Precipitation Seasonality                | 0.232  | 0.928  | - |
| <i>Moxostoma erythrurum</i> | Mean Annual Temperature (K)              | 0.822  | 0.500  | - |
|                             | Mean Diurnal Range (K)                   | 0.174  | 0.768  | - |
|                             | Temperature Seasonality                  | -0.882 | -0.425 | - |
|                             | Maximum Temperature of Warmest Month (K) | 0.403  | 0.769  | - |
|                             | Minimum Temperature of Coldest Month (K) | 0.892  | 0.434  | - |
|                             | Temperature Annual Range (K)             | -0.948 | -0.288 | - |
|                             | Annual Precipitation (mm)                | 0.789  | 0.549  | - |
|                             | Precipitation of Wettest Month (mm)      | 0.329  | 0.803  | - |

|                              |                                          |        |        |   |
|------------------------------|------------------------------------------|--------|--------|---|
|                              | Precipitation of Driest Month (mm)       | 0.931  | 0.334  | - |
|                              | Precipitation Seasonality                | -0.954 | -0.175 | - |
| <i>Noturus exilis</i>        | Mean Annual Temperature (K)              | 0.671  | 0.696  | - |
|                              | Mean Diurnal Range (K)                   | 0.030  | 0.932  | - |
|                              | Temperature Seasonality                  | -0.816 | -0.572 | - |
|                              | Maximum Temperature of Warmest Month (K) | 0.266  | 0.867  | - |
|                              | Minimum Temperature of Coldest Month (K) | 0.812  | 0.550  | - |
|                              | Temperature Annual Range (K)             | -0.951 | -0.296 | - |
|                              | Annual Precipitation (mm)                | 0.914  | 0.372  | - |
|                              | Precipitation of Wettest Month (mm)      | 0.977  | -0.122 | - |
|                              | Precipitation of Driest Month (mm)       | 0.820  | 0.547  | - |
|                              | Precipitation Seasonality                | -0.600 | -0.728 | - |
| <i>Percina nigrofasciata</i> | Mean Annual Temperature (K)              | 0.806  | 0.550  | - |
|                              | Mean Diurnal Range (K)                   | 0.009  | 0.604  | - |
|                              | Temperature Seasonality                  | -0.936 | -0.085 | - |
|                              | Maximum Temperature of Warmest Month (K) | 0.515  | 0.759  | - |

|                       |                                          |        |        |   |
|-----------------------|------------------------------------------|--------|--------|---|
|                       | Minimum Temperature of Coldest Month (K) | 0.905  | 0.403  | - |
|                       | Temperature Annual Range (K)             | -0.949 | 0.108  | - |
|                       | Annual Precipitation (mm)                | -0.162 | -0.891 | - |
|                       | Precipitation of Wettest Month (mm)      | -0.063 | -0.863 | - |
|                       | Precipitation of Driest Month (mm)       | -0.591 | -0.774 | - |
|                       | Precipitation Seasonality                | 0.632  | 0.607  | - |
| <i>Percina sciera</i> | Mean Annual Temperature (K)              | 0.985  | -0.033 | - |
|                       | Mean Diurnal Range (K)                   | 0.595  | 0.488  | - |
|                       | Temperature Seasonality                  | -0.890 | -0.368 | - |
|                       | Maximum Temperature of Warmest Month (K) | 0.877  | -0.350 | - |
|                       | Minimum Temperature of Coldest Month (K) | 0.991  | 0.068  | - |
|                       | Temperature Annual Range (K)             | -0.824 | -0.459 | - |
|                       | Annual Precipitation (mm)                | 0.055  | 0.958  | - |
|                       | Precipitation of Wettest Month (mm)      | 0.462  | 0.766  | - |
|                       | Precipitation of Driest Month (mm)       | 0.110  | 0.960  | - |
|                       | Precipitation Seasonality                | 0.121  | -0.915 | - |
